# Supplementary material for: Engineering energy bands in 0D–2D hybrid photodetectors: Cu-doped InP quantum dots on a type-III SnSe2/MoTe2 heterojunction
Source: Royal Society of Chemistry journal article supplement (doi:10.1039/d4nh00663a), 2025-01-01
Supplement: d4nh00663a1.pdf [file d4nh00663a1.pdf]

## Supporting Information for

### Engineering Energy Bands in 0D-2D Hybrid Photodetectors:

### Cu-Doped InP Quantum Dots on Type-III SnSe<sub>2</sub>/MoTe<sub>2</sub>

### Heterojunction

Jiabin Li<sup>a†</sup>, Dongxue Wang<sup>a†</sup>, Xiya Chen<sup>a</sup>, Yao Zhou<sup>a</sup>, Huanteng Luo<sup>a</sup>, Tu Zhao<sup>a</sup>,

Sheng Hu<sup>a</sup>, Zhaoqiang Zheng<sup>b</sup>, Wei Gao<sup>a\*</sup>, Xiao Liu<sup>a\*</sup>

<sup>a</sup> Guangdong Provincial Key Laboratory of Chip and Integration Technology, School of Electronic Science and Engineering (School of Microelectronics), Faculty of Engineering, South China Normal University, Foshan 528200, P. R. China.

<sup>b</sup> College of Materials and Energy, Guangdong University of Technology, Guangzhou 510006, P.R. China.

<sup>†</sup> Jiabin Li and Dongxue Wang contributed equally to this work.

#### \*Corresponding authors:

Wei Gao, E-mail: gaowei317040@m.scnu.edu.cn

Xiao Liu, E-mail: liuxiao@m.scnu.edu.cn

### Note S1: Calculation of the band structure of InP/ZnSeS:Cu/ZnS QDs

$$(\alpha hv)^{1/n} = A(hv - E_g)$$

$$E_{v,NHE} = \varphi + E_{VB-XPS} - 4.44 \text{ eV}$$

$$E_v = -4.5 - E_{v,NHE}$$

$$E_g = E_c - E_v$$

Where  $\alpha$  is the absorption coefficient,  $n = 2$ ,  $h\nu$  is the photon energy,  $h$  is Planck's constant ( $h \approx 4.13567 \times 10^{-15} \text{ eV}\cdot\text{s}$ ),  $\nu$  is the frequency of the incident photon.  $A$  is the proportionality constant.  $E_g$  is the bandgap.  $E_{v, NHE}$  is normal hydrogen electrode potential, the  $\varphi$  is the electron work function of the XPS analyzer, the value is 4.50 eV, and  $E_{VB-XPS}$  is valence band maximum value was tested by VB-XPS.<sup>1,2</sup>

### Note S2: Calculation of surface potential difference (SPD)

The SPD between  $\text{SnSe}_2$  and  $\text{MoTe}_2$  is extracted by KPFM. Firstly, the SPD between the 2D materials and the KPFM tip can be defined as:

$$eSPD_{\text{SnSe}_2} = W_{\text{Tip}} - W_{\text{SnSe}_2}$$

$$eSPD_{\text{MoTe}_2} = W_{\text{Tip}} - W_{\text{MoTe}_2}$$

Where  $e$  is elementary charge,  $W_{\text{Tip}}$ ,  $W_{\text{SnSe}_2}$  and  $W_{\text{MoTe}_2}$  are the work function of the KPFM tip,  $\text{SnSe}_2$  and  $\text{MoTe}_2$ , respectively. Thus, the SPD and the difference of Fermi level between  $\text{SnSe}_2$  and  $\text{MoTe}_2$  ( $\Delta E_f$ ) can be calculated by:

$$\Delta E_f = SPD_{MoTe_2} - SPD_{SnSe_2}$$

In this work, the SPD between SnSe<sub>2</sub> and MoTe<sub>2</sub> is 25 mV.<sup>3</sup>

### **Note S3: Calculation the photovoltaic effect in the photodetectors**

To better evaluate the photovoltaic effect of SnSe<sub>2</sub>/MoTe<sub>2</sub> and InP/SnSe<sub>2</sub>/MoTe<sub>2</sub> devices, electrical power (P<sub>el</sub>), photoelectric conversion efficiency (PCE) and fill factor (FF) are key quality factors.<sup>3</sup>

$$P_{el} = V_{ds} I_{ds}$$

$$FF = \frac{P_{elmax}}{V_{oc} I_{sc}}$$

$$PCE = \frac{P_{elmax}}{P_{in}}$$

### **Note S4: Calculation of the key figures-of-merit for photodetectors**

To better evaluate the optoelectronic performance of SnSe<sub>2</sub>/MoTe<sub>2</sub> and InP/SnSe<sub>2</sub>/MoTe<sub>2</sub> devices, important parameters including responsivity (R), detectivity (D\*), external quantum efficiency (EQE), light on/off ratio (I<sub>light</sub>/I<sub>dark</sub>), and response time (τ<sub>rise</sub> and τ<sub>decay</sub>) are calculated. These figures-of-merit can be calculated by the following equations:

$$R = \frac{I_{ph}}{PS} = \frac{I_{light} - I_{dark}}{PS}$$

$$D^* = \frac{R\sqrt{S}}{\sqrt{2qI_{dark}}} = \frac{R\sqrt{S}}{S_n} = \frac{\sqrt{BS}}{S_n}$$

$$EQE = \frac{hcI_{ph}}{\lambda qPS} = \frac{hcR}{\lambda q}$$

where  $q$  is the electronic charge,  $S$  is the effective sensing area, and  $P$  is the incident light density,  $B$  is noise bandwidth,  $h$  is the Planck constant ( $6.626 \times 10^{-34}$  J s<sup>-1</sup>),  $c$  is the light velocity,  $\lambda$  is the wavelength of the incident light,  $I_{ph}$  is the photocurrent ( $I_{ph} = I_{light} - I_{dark}$ ),  $I_{light}$  and  $I_{dark}$  are the device current under light and dark, respectively. In the time domain, rise time ( $\tau_{rise}$ ) and decay time ( $\tau_{decay}$ ) are defined as the time interval required from 10 %/90 % to 90 %/10 % of the net photocurrent.<sup>4, 5</sup>

**Note S5: Analyze direct tunneling (DT) and band-to-band tunneling (BTBT) of the photo-induced carriers**

In order to further verify tunneling mechanism of devices, the forward current transport across the heterostructure can be modeled by the Simmons approximation.<sup>6, 7</sup>

$$I_{DT} \propto V \exp\left(-\frac{4\pi\sqrt{2m^*}\phi}{h}\right)$$

or

$$\ln\left(\frac{1}{V^2}\right) \propto \ln\left(\frac{1}{V}\right) - \frac{4\pi d\sqrt{2m^*}\phi}{h}$$

$$I = C_1 V^2 \exp\left(\frac{C_2}{V}\right)$$

where  $V$  is the bias voltage,  $m^*$  is effective mass of the carrier,  $q$  is the element charge,  $h$  is the Planck constant,  $d$  is the width of the tunneling barrier,  $\phi$  is the barrier height, and  $C_1$  and  $C_2$  are constants. Under negative bias voltage, The  $E_v$  of  $\text{MoTe}_2$  exceeds the  $E_c$  of  $\text{SnSe}_2$ . This causes electrons to move from the valence band (VB) of  $\text{MoTe}_2$  to the BTBT of CB of  $\text{SnSe}_2$ , resulting in a reverse current of the Zener diode. Under positive bias voltage, the thermionic emission or thermal-assisted tunneling of majority carriers from the conduction band (CB) of  $\text{SnSe}_2$  to the CB of  $\text{MoTe}_2$  dominates the transport across the  $\text{SnSe}_2/\text{MoTe}_2$  heterojunction, resulting in the re-increase of current. The band alignments of  $\text{SnSe}_2/\text{MoTe}_2$  heterojunction at negative and positive bias voltage see in Figure S16. In the dark, the heterojunction serves as a backward diode in which the electrons cannot tunnel through the interfacial barrier at a forward bias. After illumination, excess carriers are generated on both sides of  $\text{MoTe}_2$  and  $\text{SnSe}_2$ , and accumulate at the interface due to the internal electric field. This increases the Fermi level difference between  $\text{MoTe}_2$  and  $\text{SnSe}_2$ , which is favorable for photogenic electrons to tunnel from CB of  $\text{SnSe}_2$  to CB of  $\text{MoTe}_2$  through the DT process.

#### **Note S6: Preparation of absorbed samples**

Before measurement,  $\text{SnSe}_2$  and  $\text{MoTe}_2$  were exfoliated onto a PDMS film, while  $\text{MoTe}_2$  was transferred onto a  $1 \times 1$  cm transparent sapphire substrate using a double toss via dry transfer method. The  $\text{SnSe}_2/\text{MoTe}_2$  heterojunction (Sample I) was fabricated using a simple three-axis manipulator platform equipped with a

micromanipulator through the dry transfer method. The corresponding overlapped area of Sample I is  $124 \mu\text{m}^2$ . For the InP QDs/SnSe<sub>2</sub>/MoTe<sub>2</sub> heterostructure, it was achieved by the directly spin-coating process on the SnSe<sub>2</sub>/MoTe<sub>2</sub> heterostructure on the sapphire substrate. During the measurement, the diameter of the measured spot was as small as  $5 \mu\text{m}$ , which was used to illuminate the overlapped area shown in Fig. S7a.

**Figures:**

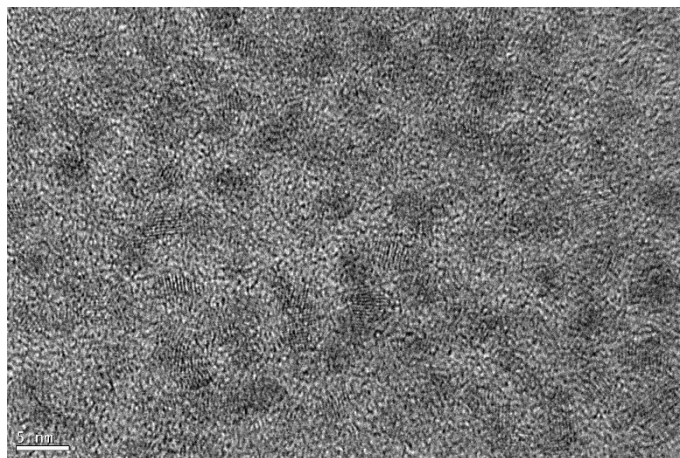

**Figure S1.** HRTEM image of InP/ZnSeS:Cu/ZnS QDs.

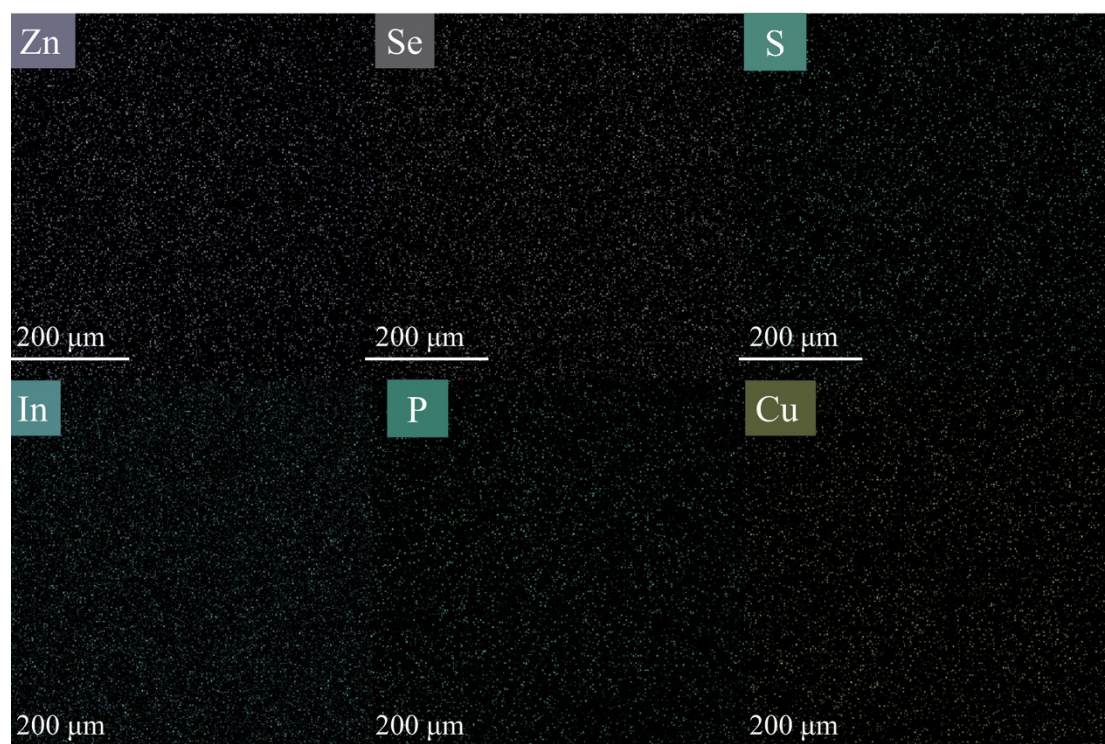

**Figure S2.** EDS element mapping of InP/ZnSeS:Cu/ZnS QDs.

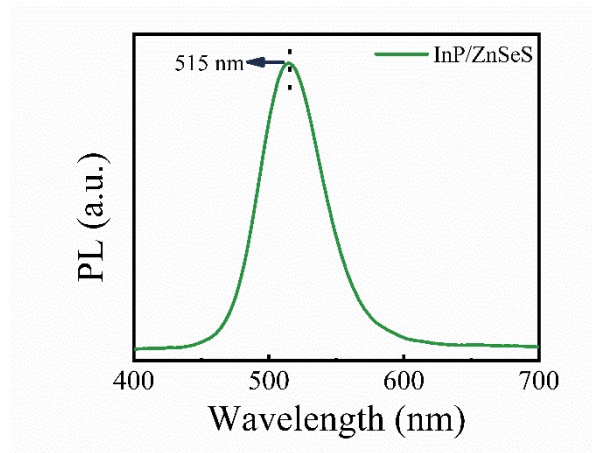

**Figure S3.** PL of InP/ZnSeS before Cu doped.

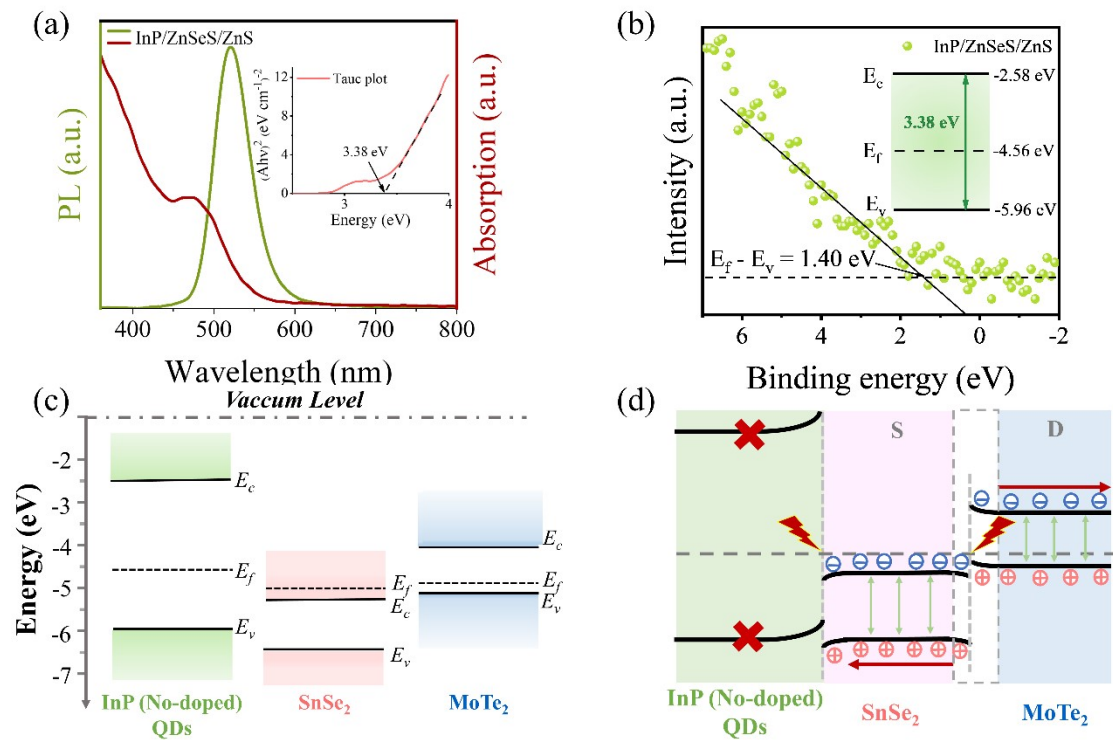

**Figure S4.** (a) Absorption (red lines) and PL (green lines) spectra of InP/ZnSeS/ZnS QDs. The inset shows the converted Kubelka-Munk functions in relation to their photon energy. (b) The band structure of InP/ZnSeS/ZnS QDs alignments estimated based on the UV-Vis absorption spectra and VB-XPS data. The inset shows the energy band diagram. (c) Energy band diagram of the InP(No-doped)/SnSe<sub>2</sub>/MoTe<sub>2</sub> heterostructure prior to contact. (d) Band diagram and current transport mechanism of the InP(No-doped)/SnSe<sub>2</sub>/MoTe<sub>2</sub> heterojunction under 532 nm laser illumination.



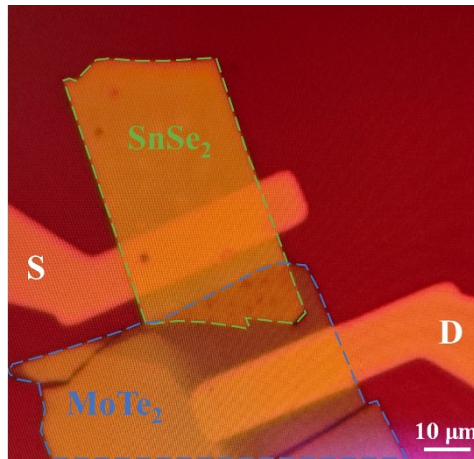

**Figure S5.** Optical microscopic image of SnSe<sub>2</sub>/MoTe<sub>2</sub> for Device I before spin-coating.

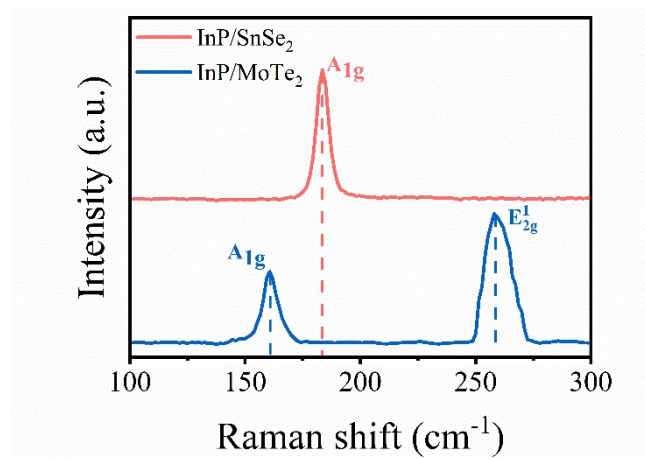

**Figure S6.** Raman spectra of InP/MoTe<sub>2</sub> and InP/SnSe<sub>2</sub>.

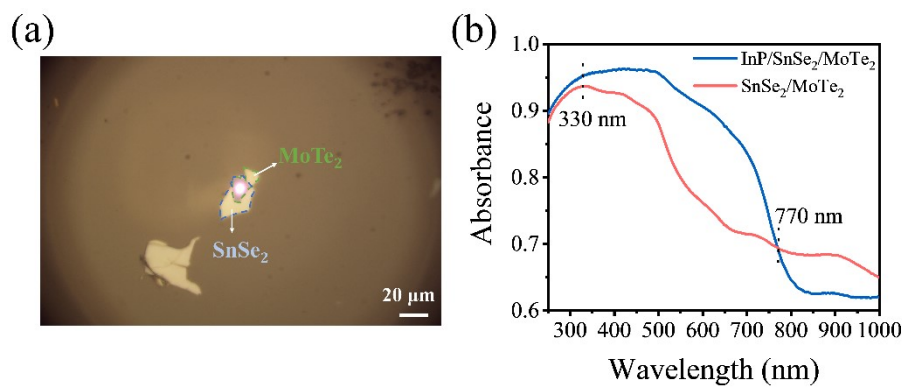

**Figure S7.** (a) Sample picture on sapphire. (b) Absorption spectra of SnSe<sub>2</sub>/MoTe<sub>2</sub> and InP/SnSe<sub>2</sub>/MoTe<sub>2</sub>.

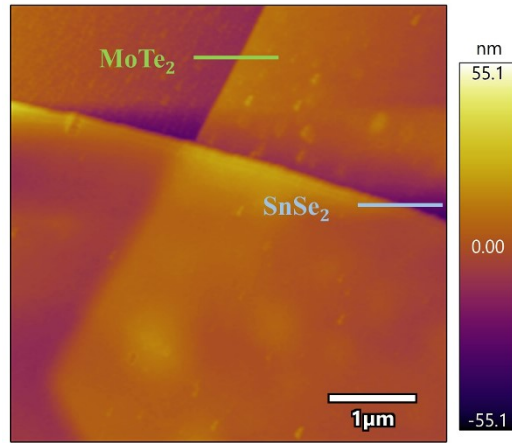

**Figure S8.** AFM image of the SnSe<sub>2</sub>/MoTe<sub>2</sub> heterojunction Device I.

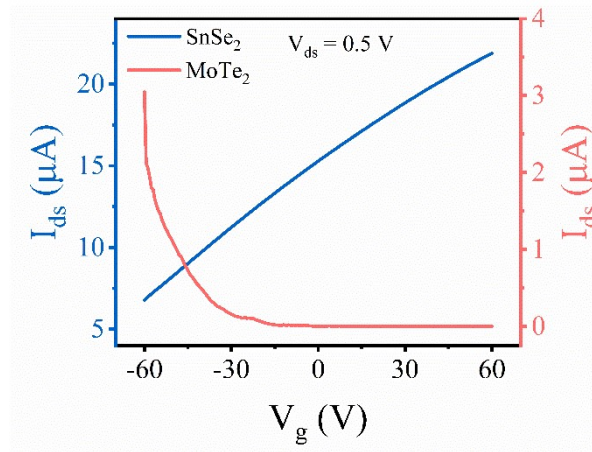

**Figure S9.** Transfer curves of multilayered MoTe<sub>2</sub> and SnSe<sub>2</sub> in Device I.

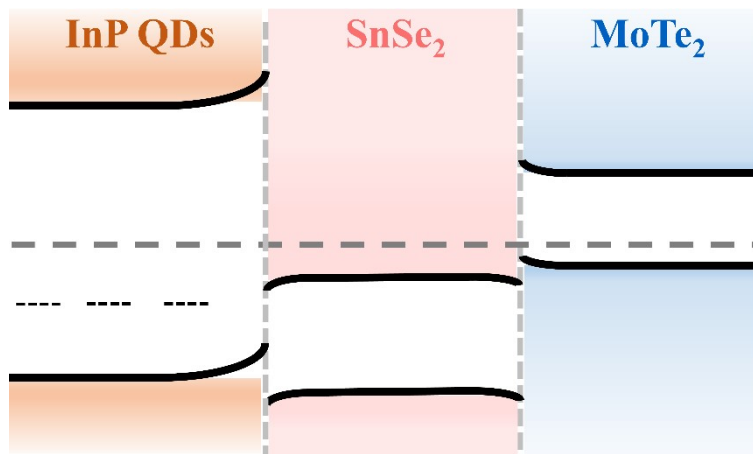

**Figure S10.** Energy band diagram of the InP/SnSe<sub>2</sub>/MoTe<sub>2</sub> heterostructure after contact at zero bias.

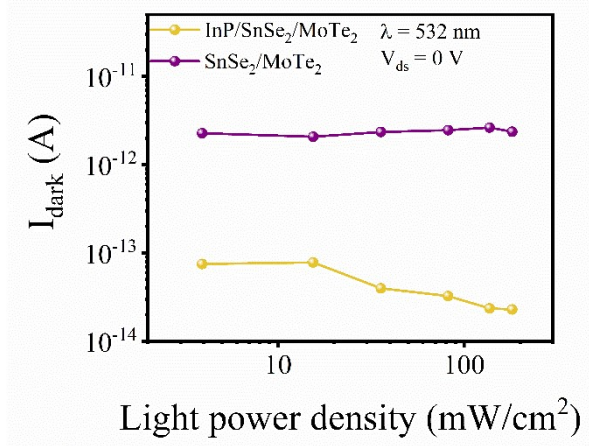

**Figure S11.**  $I_{\text{dark}}$  of InP/SnSe<sub>2</sub>/MoTe<sub>2</sub> and SnSe<sub>2</sub>/MoTe<sub>2</sub> in Device I at different light power densities.

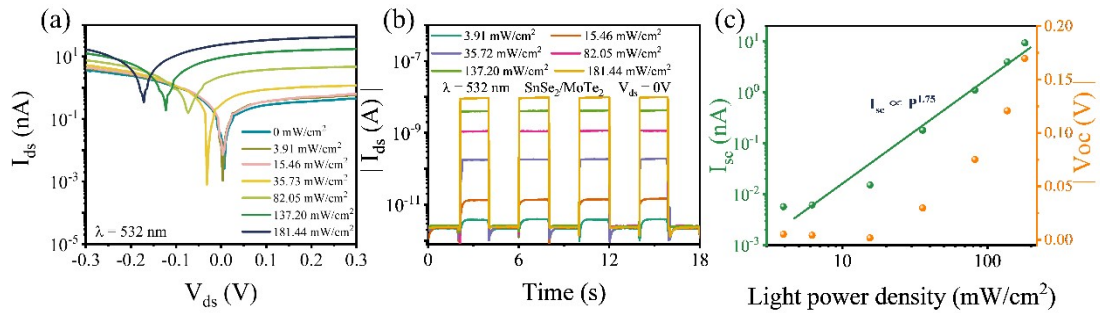

**Figure S12.** The photoelectric characteristics of SnSe<sub>2</sub>/MoTe<sub>2</sub> Device I. (a)  $I_{\text{ds}}-V_{\text{ds}}$  characteristics with respect to incident light power density. (b) The time-resolved photoresponse at different light power densities. (c) Variation of  $I_{\text{sc}}$  and  $V_{\text{oc}}$  with light power density.

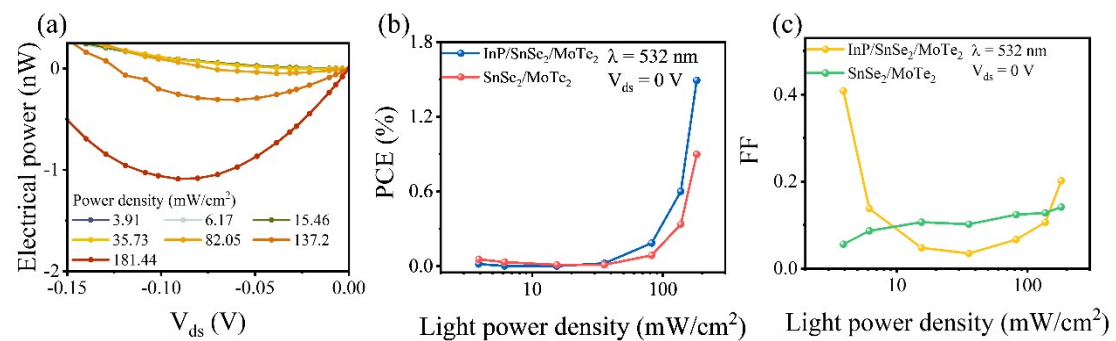

**Figure S13.** (a) SnSe<sub>2</sub>/MoTe<sub>2</sub> the electrical power as a function of  $V_{\text{ds}}$  under different light power densities. (b) (c) PCE and FF of Device I as a function of light power density under 532 nm.

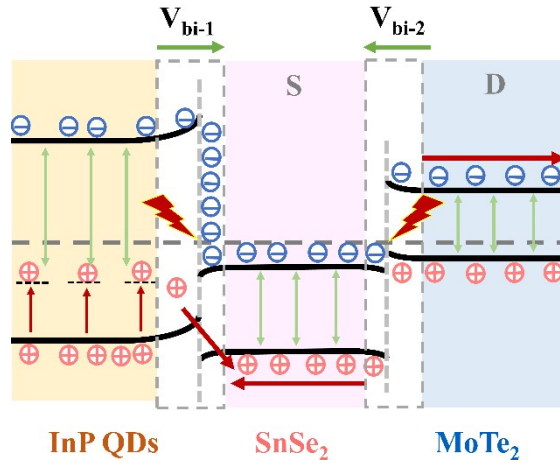

**Figure S14.** Band diagram and current transport mechanism of the InP/SnSe<sub>2</sub>/MoTe<sub>2</sub> heterojunction under high light power density at 532 nm.

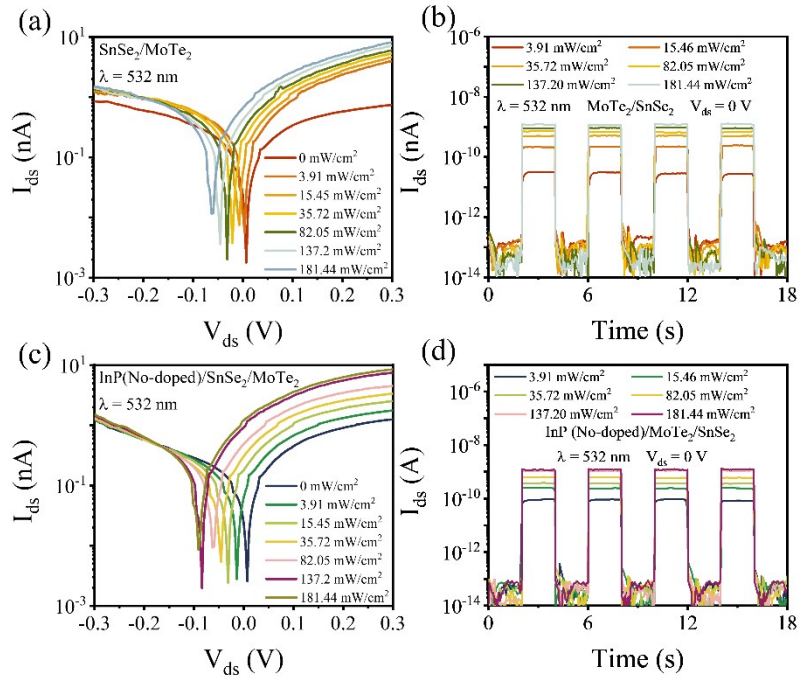

**Figure S15.** (a) (c)  $I_{ds}$ - $V_{ds}$  characteristics of SnSe<sub>2</sub>/MoTe<sub>2</sub> and InP(No-doped)/SnSe<sub>2</sub>/MoTe<sub>2</sub> heterostructure with respect to incident light power density. (b) (d) The time-resolved photoresponse of SnSe<sub>2</sub>/MoTe<sub>2</sub> and InP(No-doped)/SnSe<sub>2</sub>/MoTe<sub>2</sub> heterostructure at different light power densities.

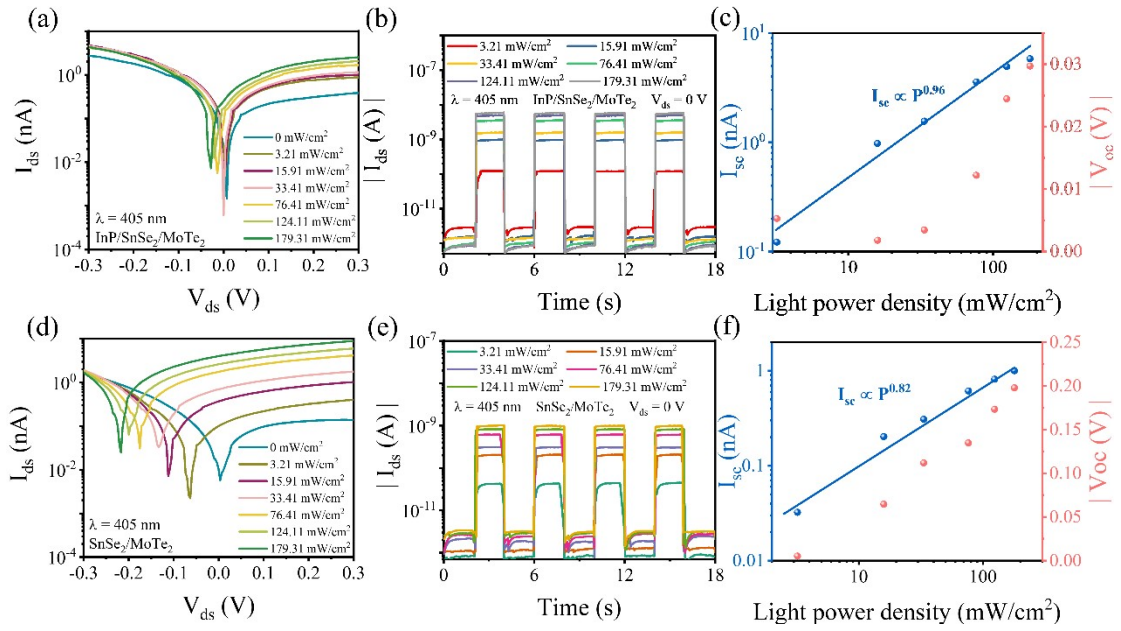

**Figure S16. Photovoltaic properties of Device I under 405 nm laser.** (a) (d)  $I_{ds}$ - $V_{ds}$  curves of the Device I under different light power densities. (b) (e) The time-resolved photoresponse at different light power densities. (c) (f) Variation of  $I_{sc}$  and  $V_{oc}$  with light power density.

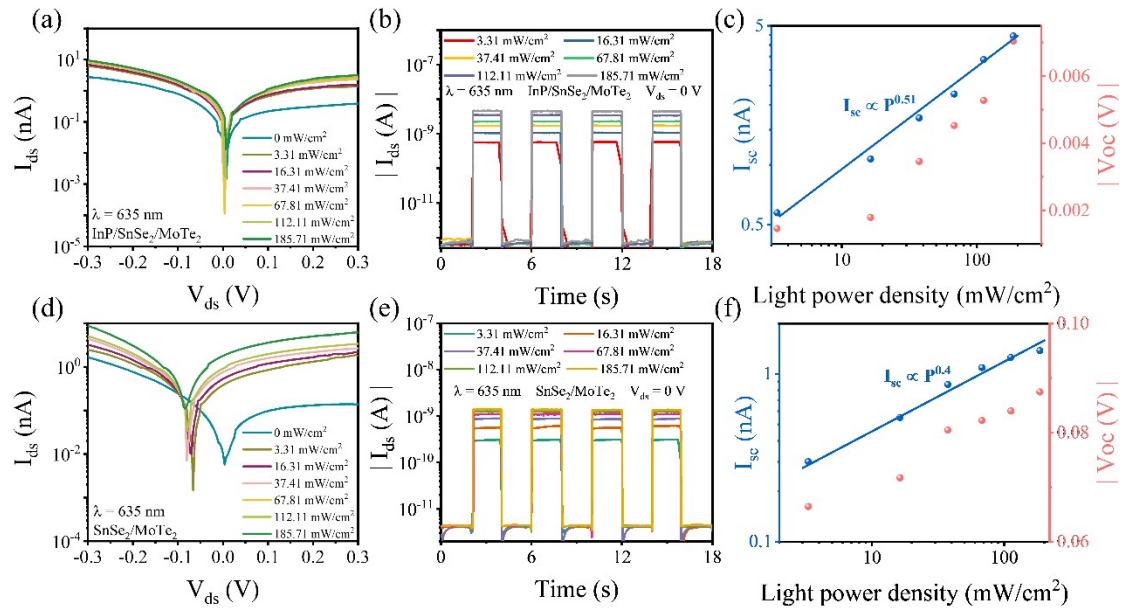

**Figure S17. Photovoltaic properties of Device I under 635 nm laser.** (a) (d)  $I_{ds}$ - $V_{ds}$  curves of the Device I under different light power densities. (b) (e) The time-resolved photoresponse at different light power densities. (c) (f) Variation of  $I_{sc}$  and  $V_{oc}$  with light power density.

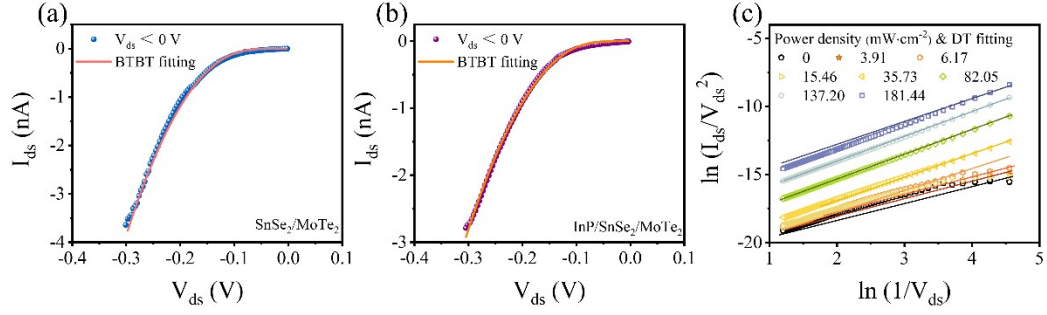

**Figure S18.** (a) (b) Band-to-band tunneling (BTBT) plots fitting of backward current for Device I. (c) DT plots of  $\ln(I_{ds}/V_{ds}^2)$  and  $\ln(1/V_{ds})$  obtained from Figure S11(b). The solid line represents the DT fitting curve of the experimental data.

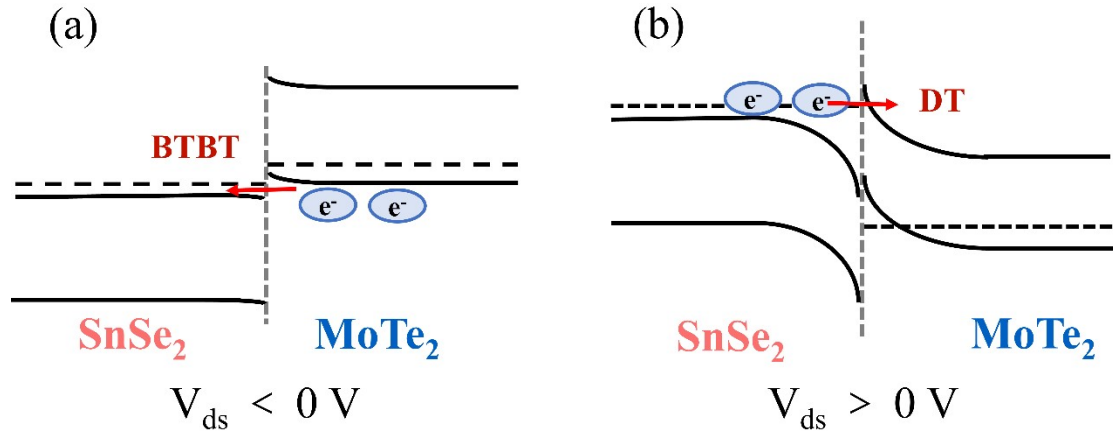

**Figure S19.** Schematic band alignments of SnSe<sub>2</sub>/MoTe<sub>2</sub> heterojunction at  $V_{ds} < 0$  V and  $V_{ds} > 0$  V.

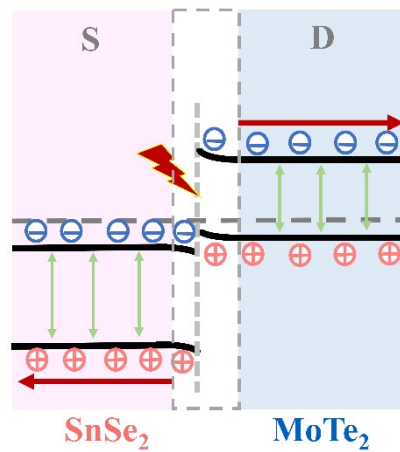

**Figure S20.** Band diagram and charge transport mechanism of the SnSe<sub>2</sub>/MoTe<sub>2</sub> heterojunction under illumination.

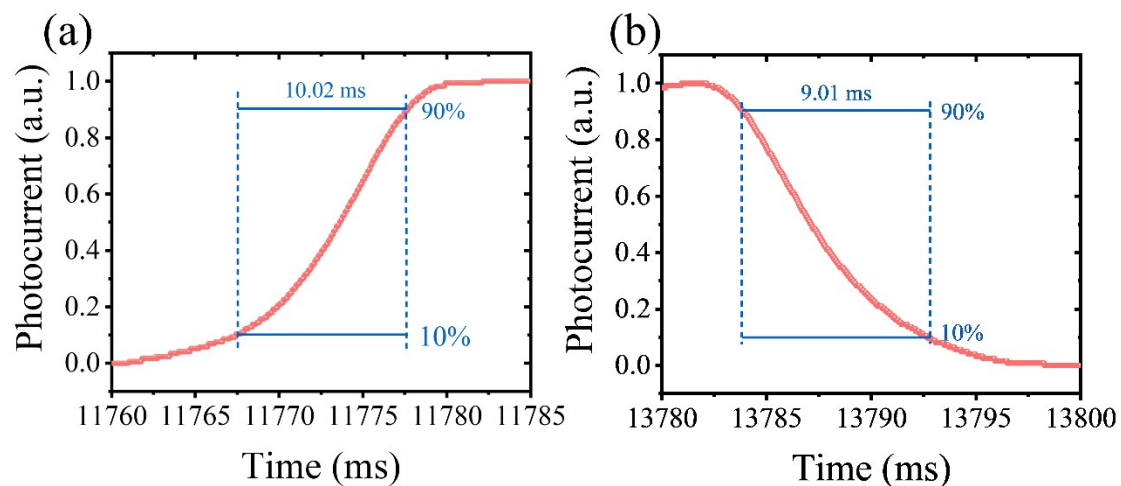

**Figure S21. Photovoltaic rising/decaying time.** (a) (b) Time-solved photocurrent of the SnSe<sub>2</sub>/MoTe<sub>2</sub> heterojunction for Device I before spin-coating.

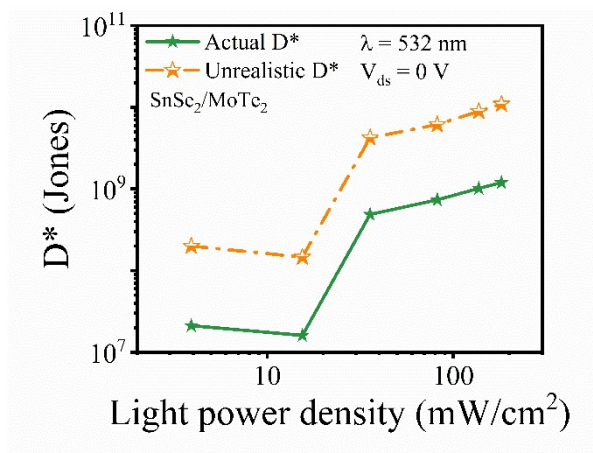

**Figure S22.** The unrealistic  $D^*$  and the actual  $D^*$  of SnSe<sub>2</sub>/MoTe<sub>2</sub> as a function of the incident light power density.

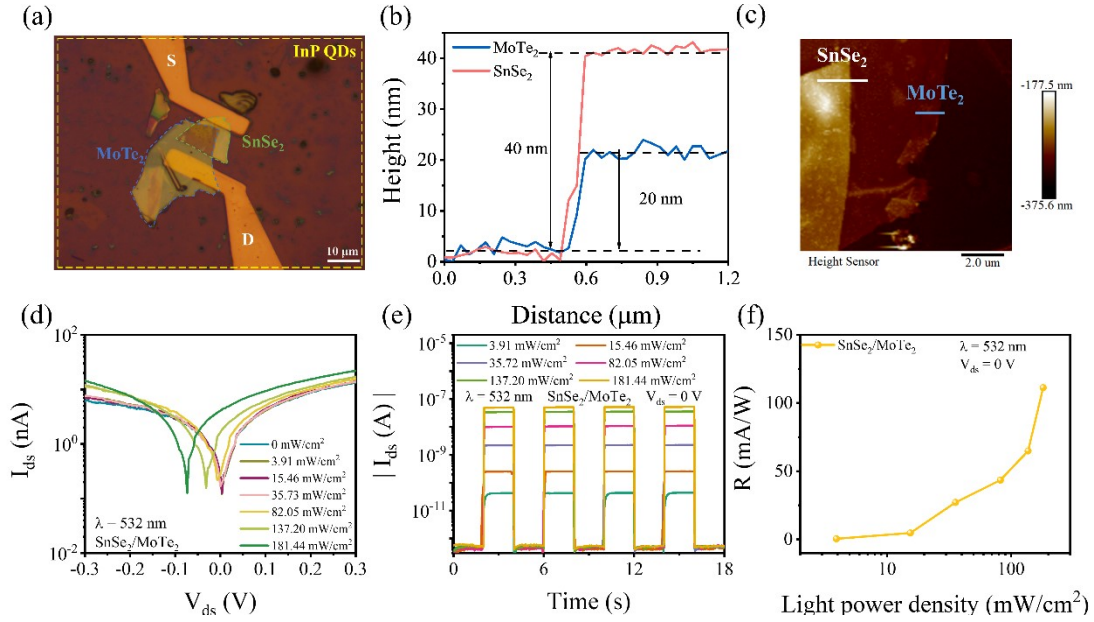

**Figure S23. The photoelectric characteristics of Device II under 532 nm laser.** (a) Optical microscopic images of InP/SnSe<sub>2</sub>/MoTe<sub>2</sub>. (b) Height profiles of MoTe<sub>2</sub> and SnSe<sub>2</sub>. (c) AFM image of the SnSe<sub>2</sub>/MoTe<sub>2</sub> heterojunction. (d)  $I_{ds}$ - $V_{ds}$  curves of the SnSe<sub>2</sub>/MoTe<sub>2</sub> under different light power densities. (e) The time-resolved photoresponse of SnSe<sub>2</sub>/MoTe<sub>2</sub> at different light power densities.

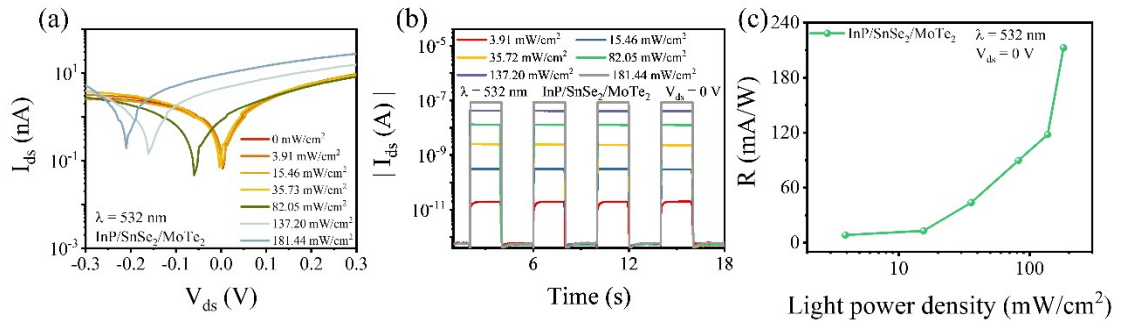

**Figure S24. The photoelectric characteristics of Device II under 532 nm laser.** (a)  $I_{ds}$ - $V_{ds}$  curves of the InP/SnSe<sub>2</sub>/MoTe<sub>2</sub> under different light power densities. (b) The time-resolved photoresponse of InP/SnSe<sub>2</sub>/MoTe<sub>2</sub> at different light power densities. (c)  $R$  of Device I as a function of light power density.



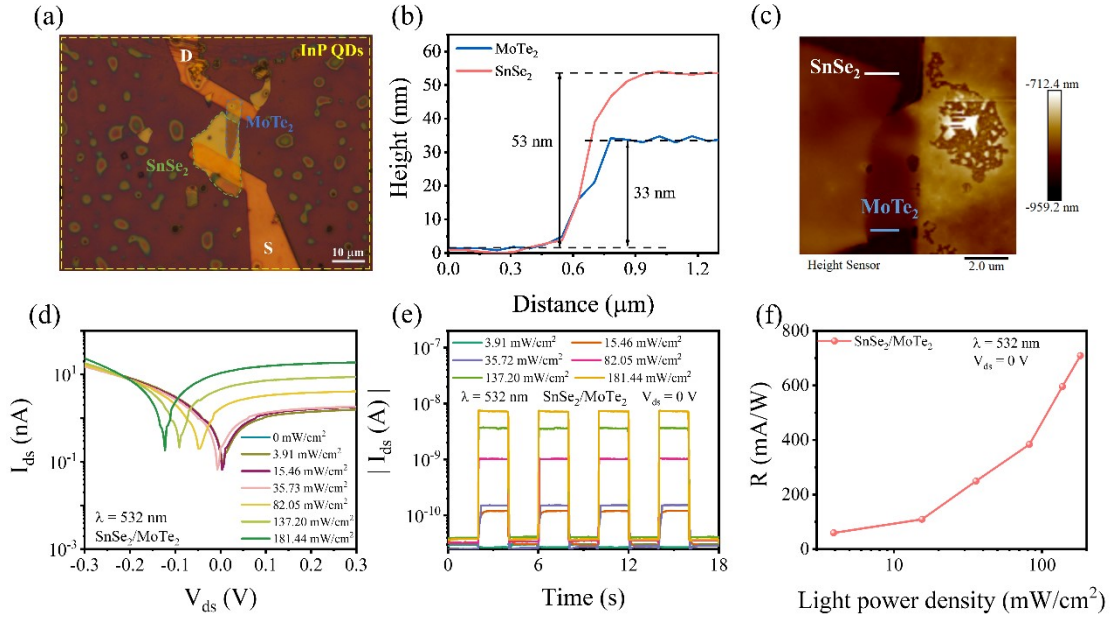

**Figure S25. The photoelectric characteristics of Device III under 532 nm laser.** (a) Optical microscope images of Device III. (b) Height profiles of MoTe<sub>2</sub> and SnSe<sub>2</sub>. (c) AFM image of the SnSe<sub>2</sub>/MoTe<sub>2</sub> heterojunction. (d)  $I_{ds}$ - $V_{ds}$  curves of the SnSe<sub>2</sub>/MoTe<sub>2</sub> under different light power densities. (e) The time-resolved photoresponse of SnSe<sub>2</sub>/MoTe<sub>2</sub> at different light power densities. (f)  $R$  of Device III as a function of light power density.

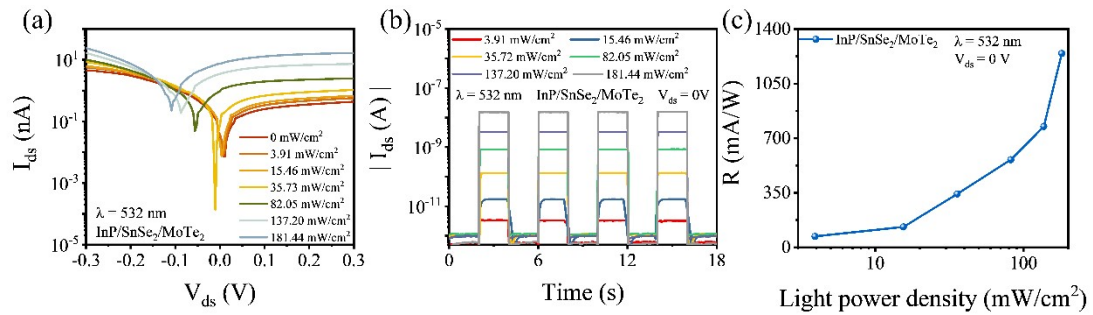

**Figure S26. The photoelectric characteristics of Device III under 532 nm laser.** (a)  $I_{ds}$ - $V_{ds}$  curves of the InP/SnSe<sub>2</sub>/MoTe<sub>2</sub> under different light power densities. (b) The time-resolved photoresponse of InP/SnSe<sub>2</sub>/MoTe<sub>2</sub> at different light power densities. (c)  $R$  of Device III as a function of light power density.

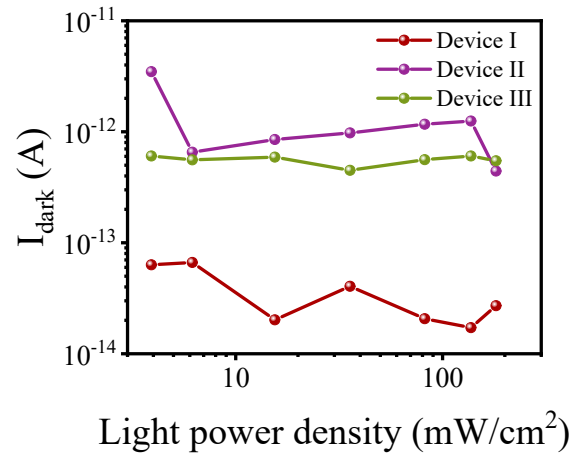

**Figure S27.**  $I_{\text{dark}}$  of InP/SnSe<sub>2</sub>/MoTe<sub>2</sub> in Device I, Device II and Device III at different light power densities.

## References

1. X. Chen, Y. Guo, J. Li, H. Yang, Z. Chen, D. Luo and X. Liu, *Chem. Eng. J.*, 2024, **496**.
2. R. G. Xie and X. G. Peng, *J. Am. Chem. Soc.*, 2009, **131**, 10645-10651.
3. J. Ma, S. Chen, L. Zhao, J. Chen, Z. Lan, M. Yang, Y. Sun, Z. Zheng, W. Gao and J. Li, *Adv. Opt. Mater.*, 2024, **12**.
4. H. Shang, Y. Hu, F. Gao, M. Dai, S. Zhang, S. Wang, D. Ouyang, X. Li, X. Song, B. Gao, T. Zhai and P. Hu, *ACS Nano*, 2022, **16**, 21293-21302.
5. Z. Li, T. Zheng, M. Yang, Y. Sun, D. Luo, W. Gao, Z. Zheng and J. Li, *Adv. Opt. Mater.*, 2024, **12**.
6. S. Kim, H. Du, T. Kim, S. Shin, H.-k. Song, H. Kim, D. Kang, C.-W. Lee and S. Seo, *Npj 2d Materials and Applications*, 2020, **4**.
7. S. Chen, J. Ma, N. Bu, T. Zheng, J. Chen, J. Huang, X. Luo, Z. Zheng, N. Huo, J. Li and W. Gao, *ACS Appl. Mater. Interfaces*, 2024, **16**, 33740-33751.
